# Supplementary material for: Evaluating the low-rank coal biodegradation efficiency bioaugmented with activated sludge
Source: Research Square preprint supplement (doi:10.21203/rs.3.rs-4019431/v1), 2024-03-08
Supplement: Supplementary file 1 [file 04cff718c2e0a8197425b2d1.docx]

Table 3. EEM spectra of humic substances isolated from treated coal samples: a – EKI, b – OIQ and с – KAR.

| Sample name | Ex/Em (nm) | Contour plot |
| --- | --- | --- |
| EKI | Peak E- 310/425  Peak E1- 255/440 | 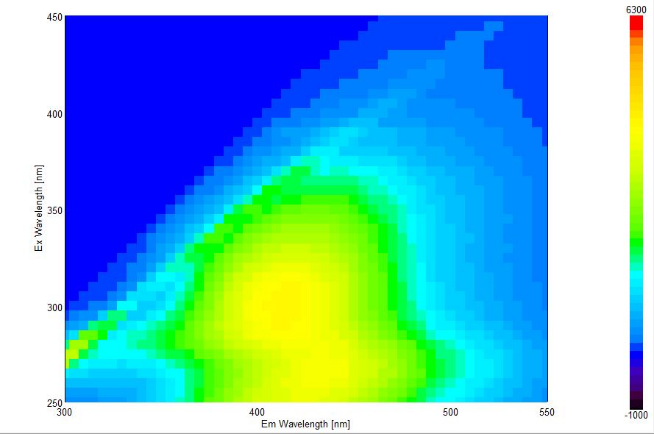 |
| OIQ | Peak O - 310/415  Peak O 1 - 280-350 | 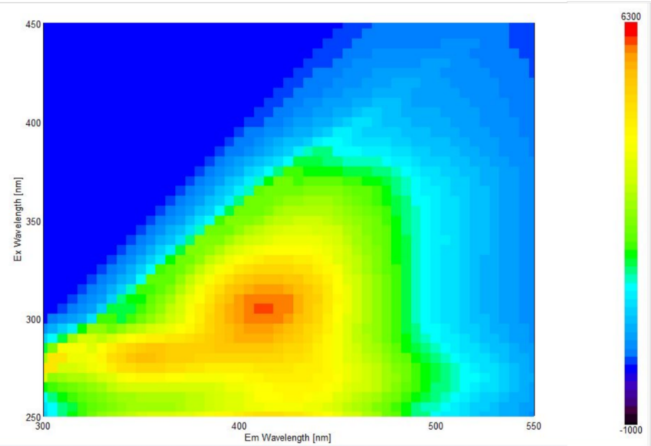 |
| KAR | Peak K- 300/420  Peak K1- 270/440 | 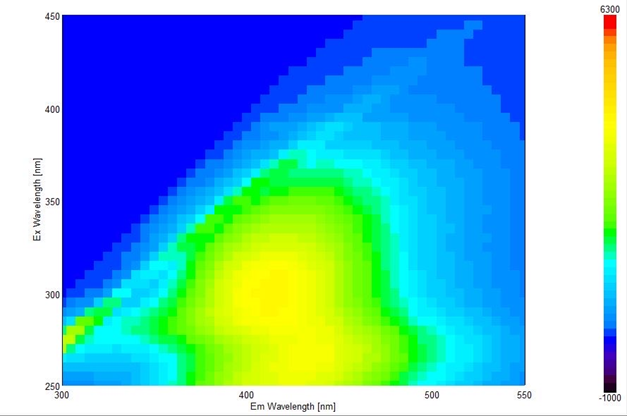 |
